# Supplementary material for: Fabrication of high-performance p-type thin film transistors using atomic-layer-deposited SnO films
Source: Royal Society of Chemistry journal article supplement (doi:10.1039/c6tc04750e), 2017-01-01
Supplement: c6tc04750e1.pdf [file c6tc04750e1.pdf]

## Electronic Supplementary Information for

### High-Performance p-Type Thin Film Transistors Using Atomic-Layer-Deposited SnO

#### Films

*Soo Hyun Kim,<sup>a</sup> In-Hwan Baek,<sup>a,b</sup> Da Hye Kim,<sup>c</sup> Jung Joon Pyeon,<sup>a,d</sup> Taek-Mo Chung,<sup>c</sup> Seung-Hyub Baek,<sup>a</sup> Jin-Sang Kim,<sup>a</sup> Jeong Hwan Han,<sup>c\*</sup> and Seong Keun Kim<sup>a\*</sup>*

<sup>a</sup>Center for Electronic Materials, Korea Institute of Science and Technology, Seoul, 02792, South Korea

<sup>b</sup>Department of Materials Science and Engineering, Seoul National University, Seoul, 08826, South Korea

<sup>c</sup>Division of Advanced Materials, Korea Research Institute of Chemical Technology, Daejeon, 34114, South Korea

<sup>d</sup>KU-KIST Graduate School of Converging Science and Technology, Korea University, Seoul 02841, Korea

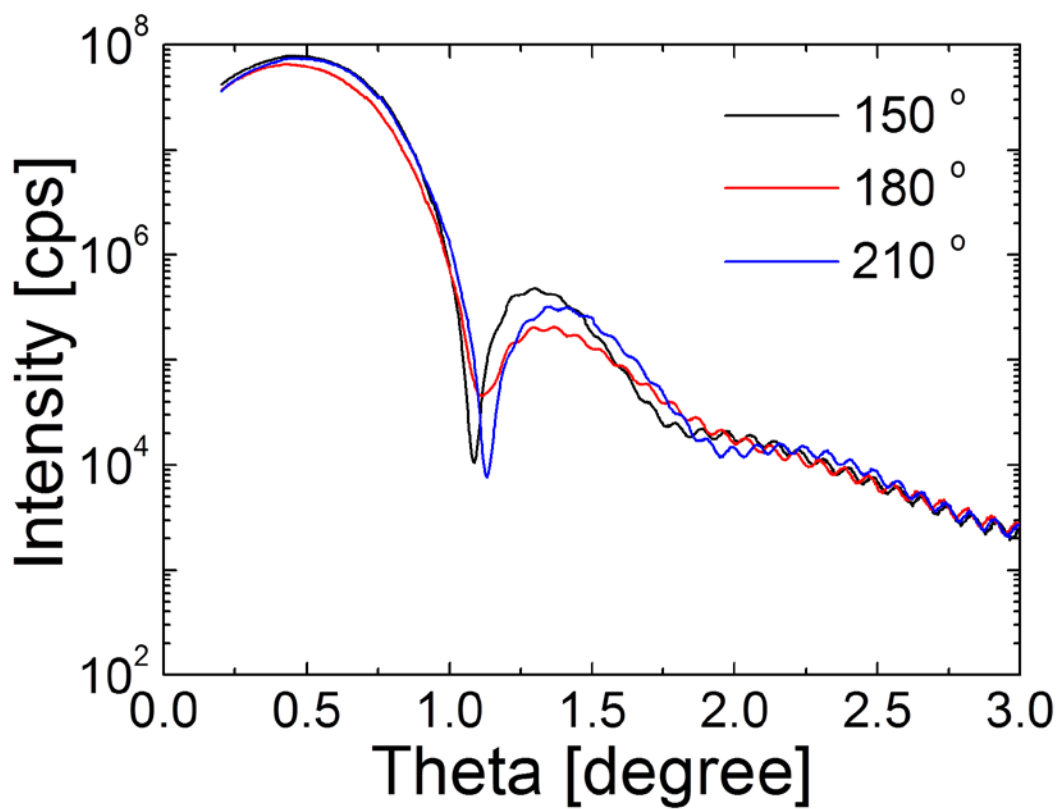

**Figure S1.** X-ray reflectivity spectra of the SnO films grown at 150, 180, and 210 °C. The densities of the SnO films, which is evaluated from a critical angle in the graph, are approximately 5.5 – 5.6  $\text{gcm}^{-3}$ . Negligible difference in the film density is observed in terms of the growth temperature.

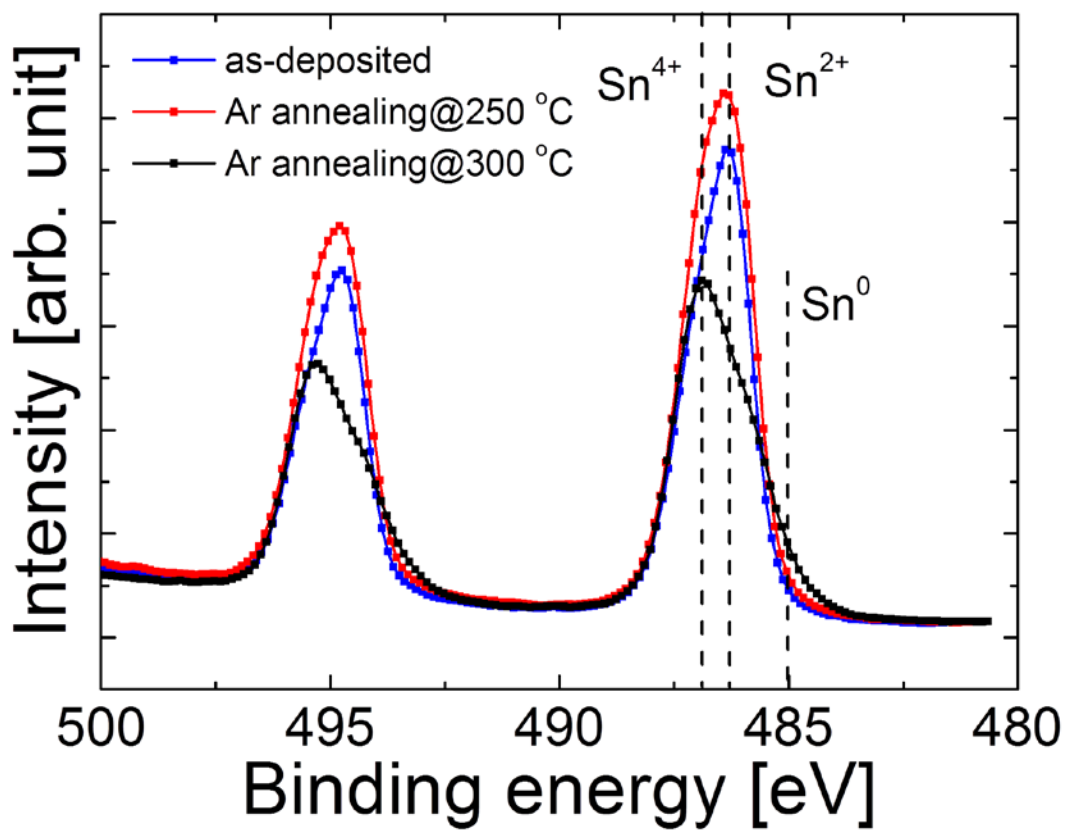

**Figure S2.** X-ray photoelectron Sn 3d spectra of the as-grown SnO film and the post-annealed SnO films at 250 and 300 °C under Ar atmosphere.

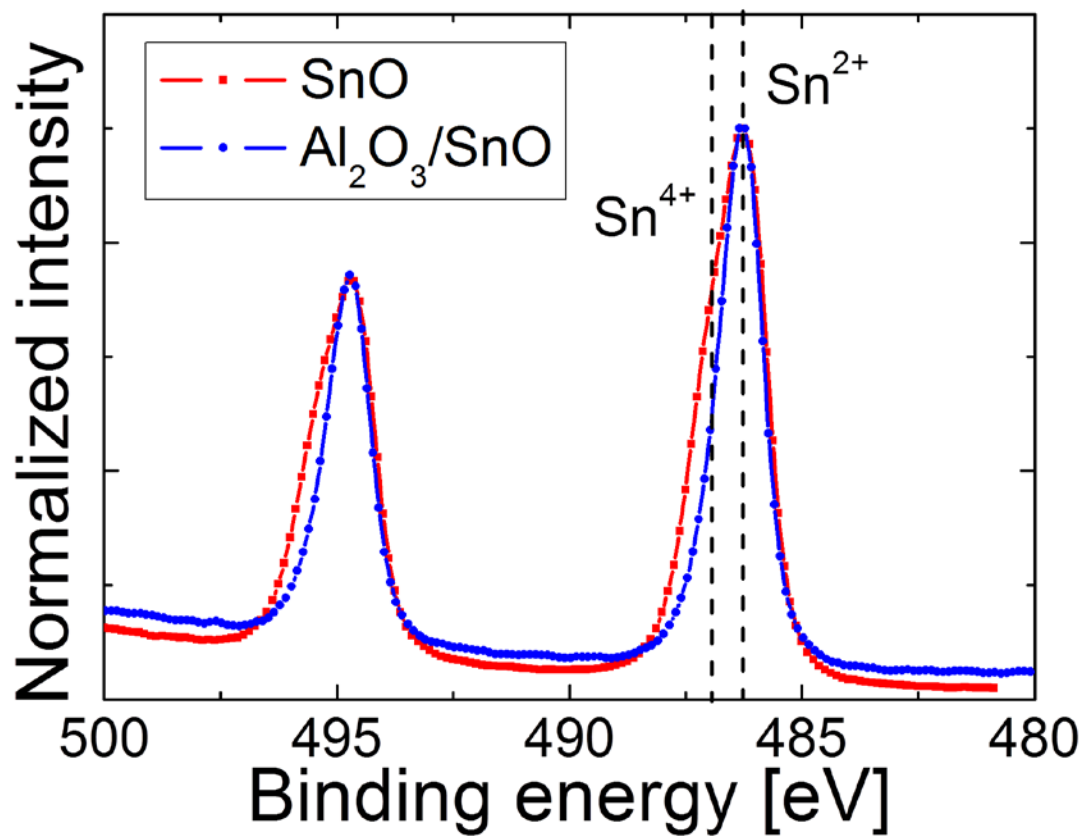

**Figure S3.** X-ray photoelectron Sn 3d spectra of the un-passivated SnO film and the 1.5 nm-thick Al<sub>2</sub>O<sub>3</sub> coated SnO film.
